# Supplementary material for: Cl−making overall water splitting possible on TiO2-based photocatalysts
Source: Royal Society of Chemistry journal article supplement (doi:10.1039/c4cy00408f), 2014-06-12
Supplement: c4cy00408f1.pdf [file c4cy00408f1.pdf]

## *Supporting Information*

# Cl<sup>-</sup> making the overall water splitting possible on TiO<sub>2</sub>-based photocatalysts

Lei Huang,<sup>†§</sup>Rengui Li,<sup>†‡§</sup>Ruifeng Chong,<sup>†‡</sup> Gang Liu,<sup>†</sup>Jingfeng Han,<sup>†‡</sup> Can Li\*<sup>†</sup>

<sup>†</sup>State Key Laboratory of Catalysis, Dalian National Laboratory for Clean Energy,  
Dalian Institute of Chemical Physics, Chinese Academy of Sciences, Zhongshan Road  
457, Dalian, 116023, China.

<sup>‡</sup>University of Chinese Academy of Sciences, Beijing, 100049, China.

*<sup>§</sup>Both authors contributed equally to this work*

### **Corresponding Author**

\*E-mail: canli@dicp.ac.cn; Tel: 86-411-84379070; Fax: 86-411-84694447.

## **1. Experimental**

### **1.1 Sample preparation.**

Commercialized P25 was purchased from Degussa. A hydrothermal method was applied to make the chloride ion closely be adsorbed on the surface of TiO<sub>2</sub>. In a typical process, desired volumes of HCl (38 %) were added dropwise to 15 mL of Ti(OBu)<sub>4</sub> (98%, Alfa) in a 100mL Teflon-lined stainless steel autoclave. The solution was then heated to 180 °C and kept at the temperature for 36 h. When the solution was naturally cooled to room temperature, the obtained white products were connected by centrifugation at 10,000 rpm and washed several times with a mixture of ethanol and deionized water. The obtained products were dried in air at 105 °C for 12h and kept for further use. The obtained TiO<sub>2</sub> was in the form of rutile phase and denoted as Cl-TiO<sub>2</sub>.

### **1.2 Characterization**

X-ray photoelectron spectra (XPS) were obtained on an X-ray photoelectron spectroscopy (ESCALAB 250Xi, Thermo) equipped with a monochromatized Al K $\alpha$  X-ray ( $h\nu = 1486.6$  eV) and an electron flood gun. The samples were washed for three times by acetone and dried in vacuum before test. X-ray diffraction (XRD) analysis was carried out on an X-ray diffractometer (Rigaku; Mini-Flex diffractometer) using Cu K $\alpha$  as radiation source, the applied current and voltage were 30 mA and 40 kV, respectively. UV-vis spectrum was detected on V-650 UV/VIS spectrometer (JASCO), scanning range, 200-800 nm, scanning rate, 200 nm/min.

### **1.3 Photocatalytic reaction**

The photocatalytic reactions were carried out in a Pyrex reaction cell connected to a closed gas circulation and evacuation system. Typically, 0.050 g of TiO<sub>2</sub> sample was dispersed in 100 ml deionized water by sonication treatment. Desired amount of H<sub>2</sub>PtCl<sub>6</sub> (or RhCl<sub>3</sub>) solution was added dropwise in the solution for Pt (Rh) loading. The solution was then degassed for 30 min, followed by irradiation with a 300 W Xe lamp (ILC technology; CERAMAX LX-300). The reactant solution was stirred and maintained at room temperature by a flow of cooling water during the photocatalytic reaction. The amount of evolved H<sub>2</sub> and O<sub>2</sub> were determined with on-line gas chromatography (Tianmei; GC 7890, MS-5 A column, TCD, Ar Carrier).

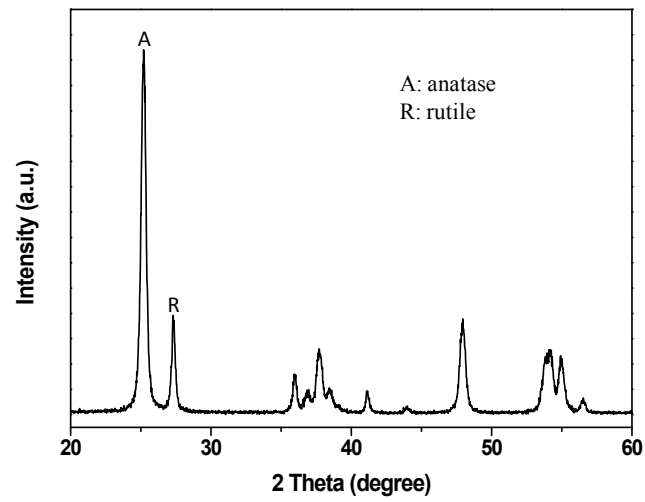

Figure S1. XRD patterns of the used P25 sample. It shows the mixed phases of anatase and rutile, which indicates the typical characteristics of standard sample of commercial P25.

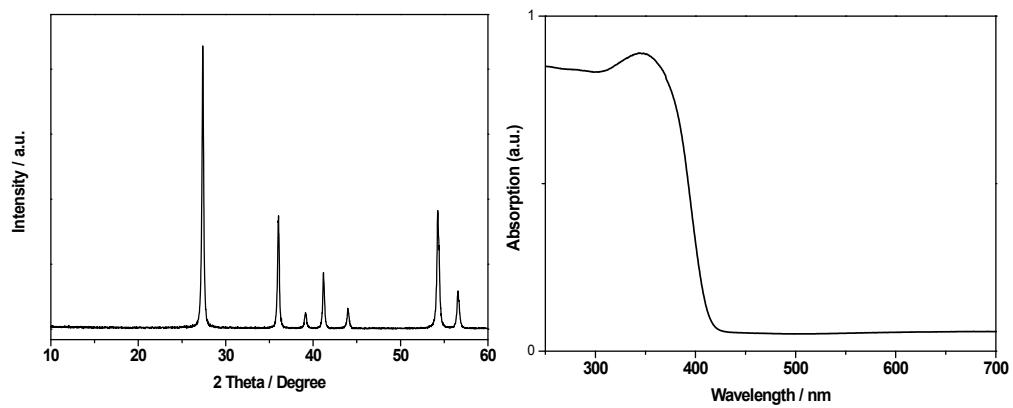

Figure S2. The XRD patterns (a) and UV-Vis reflection spectra (b) of prepared Cl-TiO<sub>2</sub>.

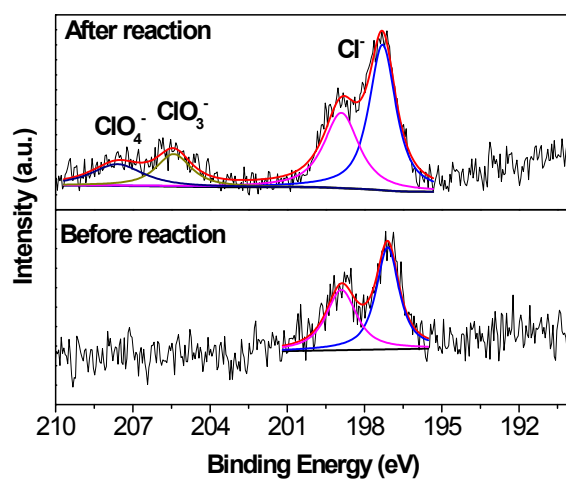

Figure S3. The XPS spectra of Cl 2p on Cl-TiO<sub>2</sub> (washed for 2 times) before and after photocatalytic water splitting reactions.

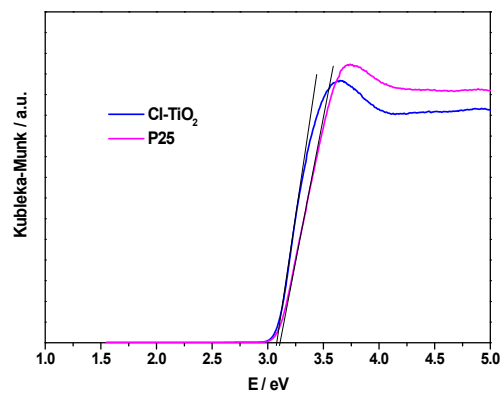

Figure S4. The kubelka-Munk function for P25 and Cl-TiO<sub>2</sub> samples.

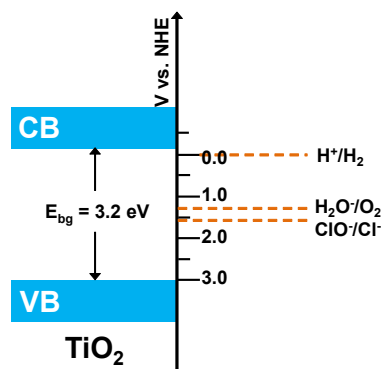

Figure S5. The corresponding energy level diagram for  $\text{ClO}^-/\text{Cl}^-$ .
